# Supplementary figures and images for: Limited Sustained Local Transmission of HIV-1 CRF01_AE in New South Wales, Australia
Source: MDPI journal article supplement (doi:10.3390/v11050482), 2019-05-27

global data

clade

singleton

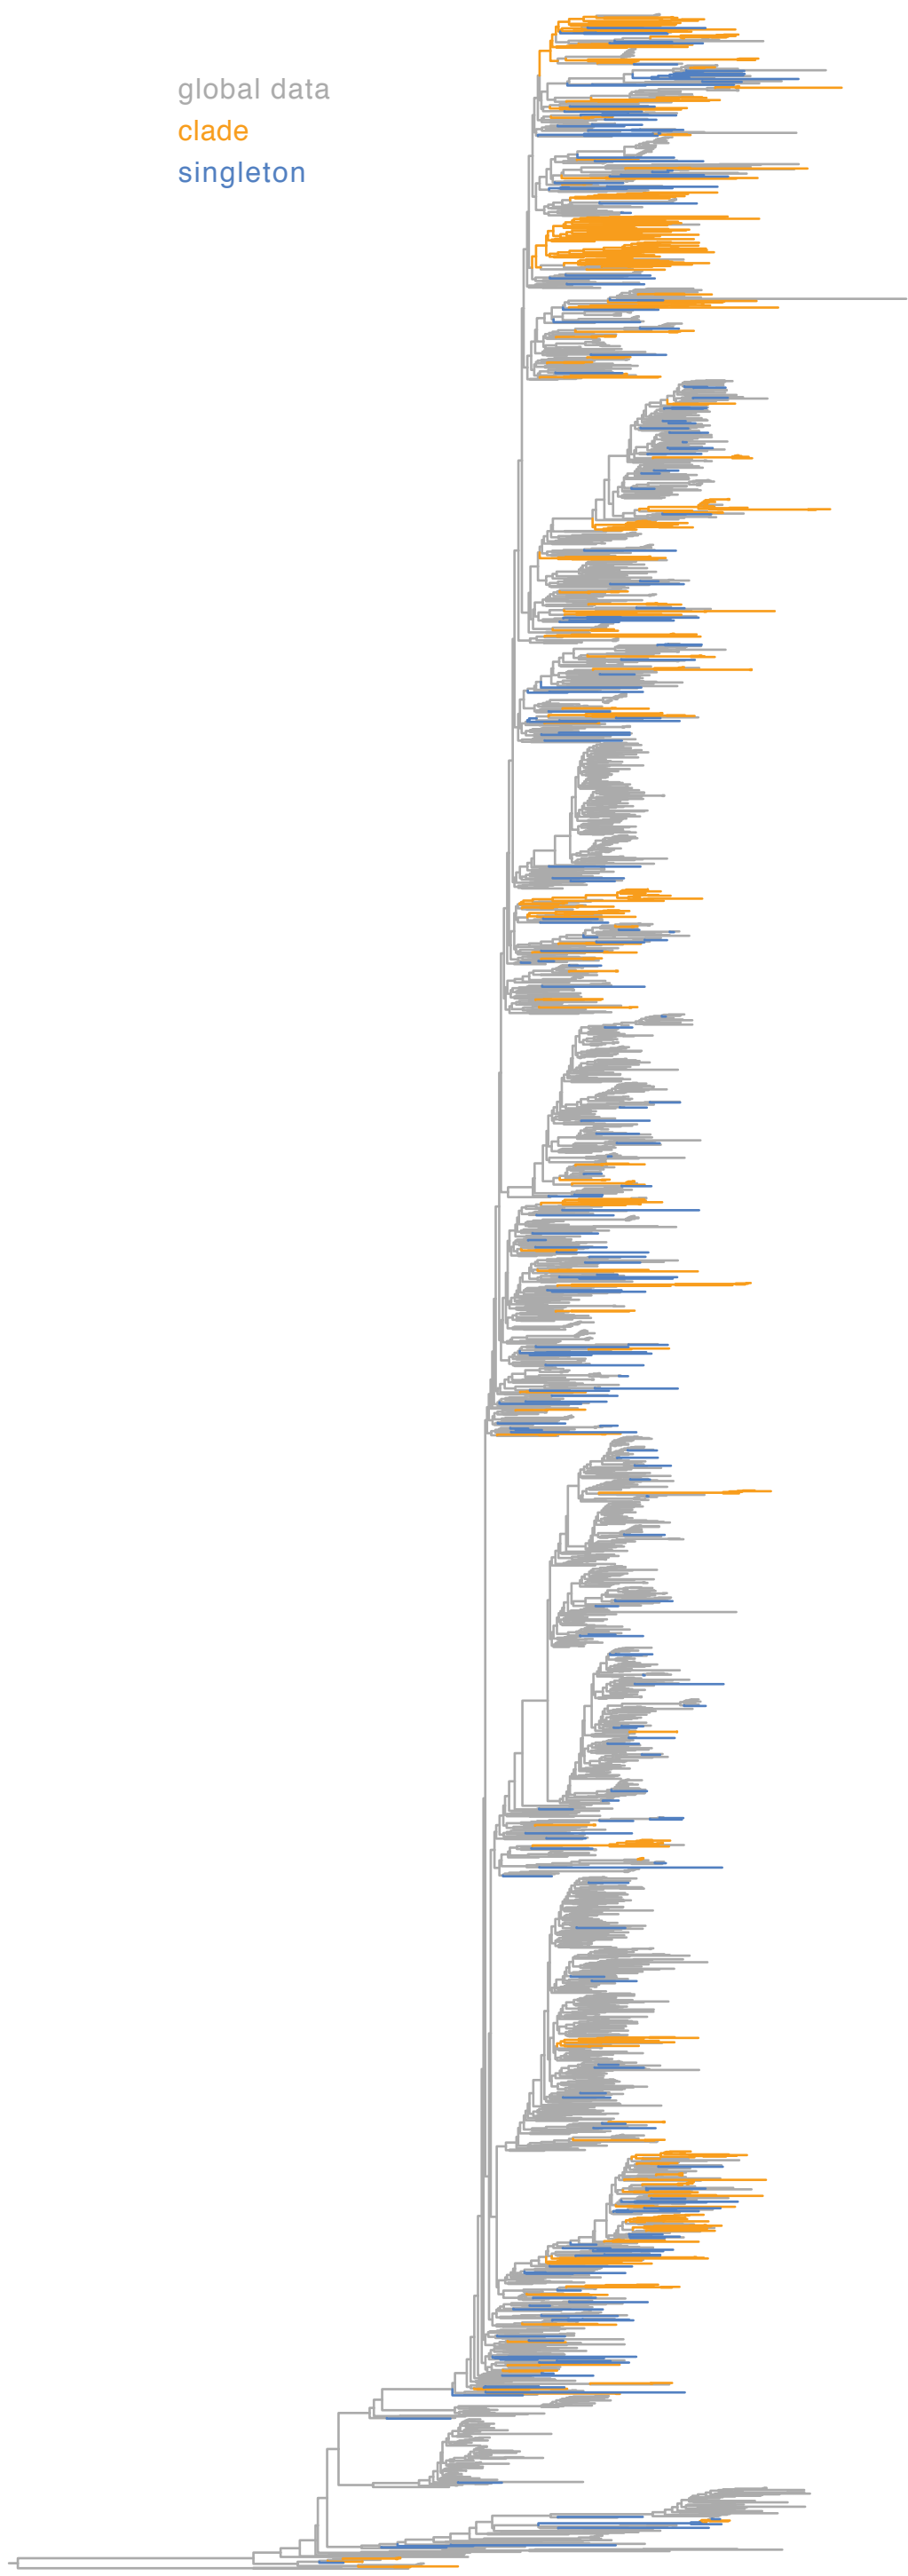

0.03

Supplement: s1 [file s1]

### Transmission network size

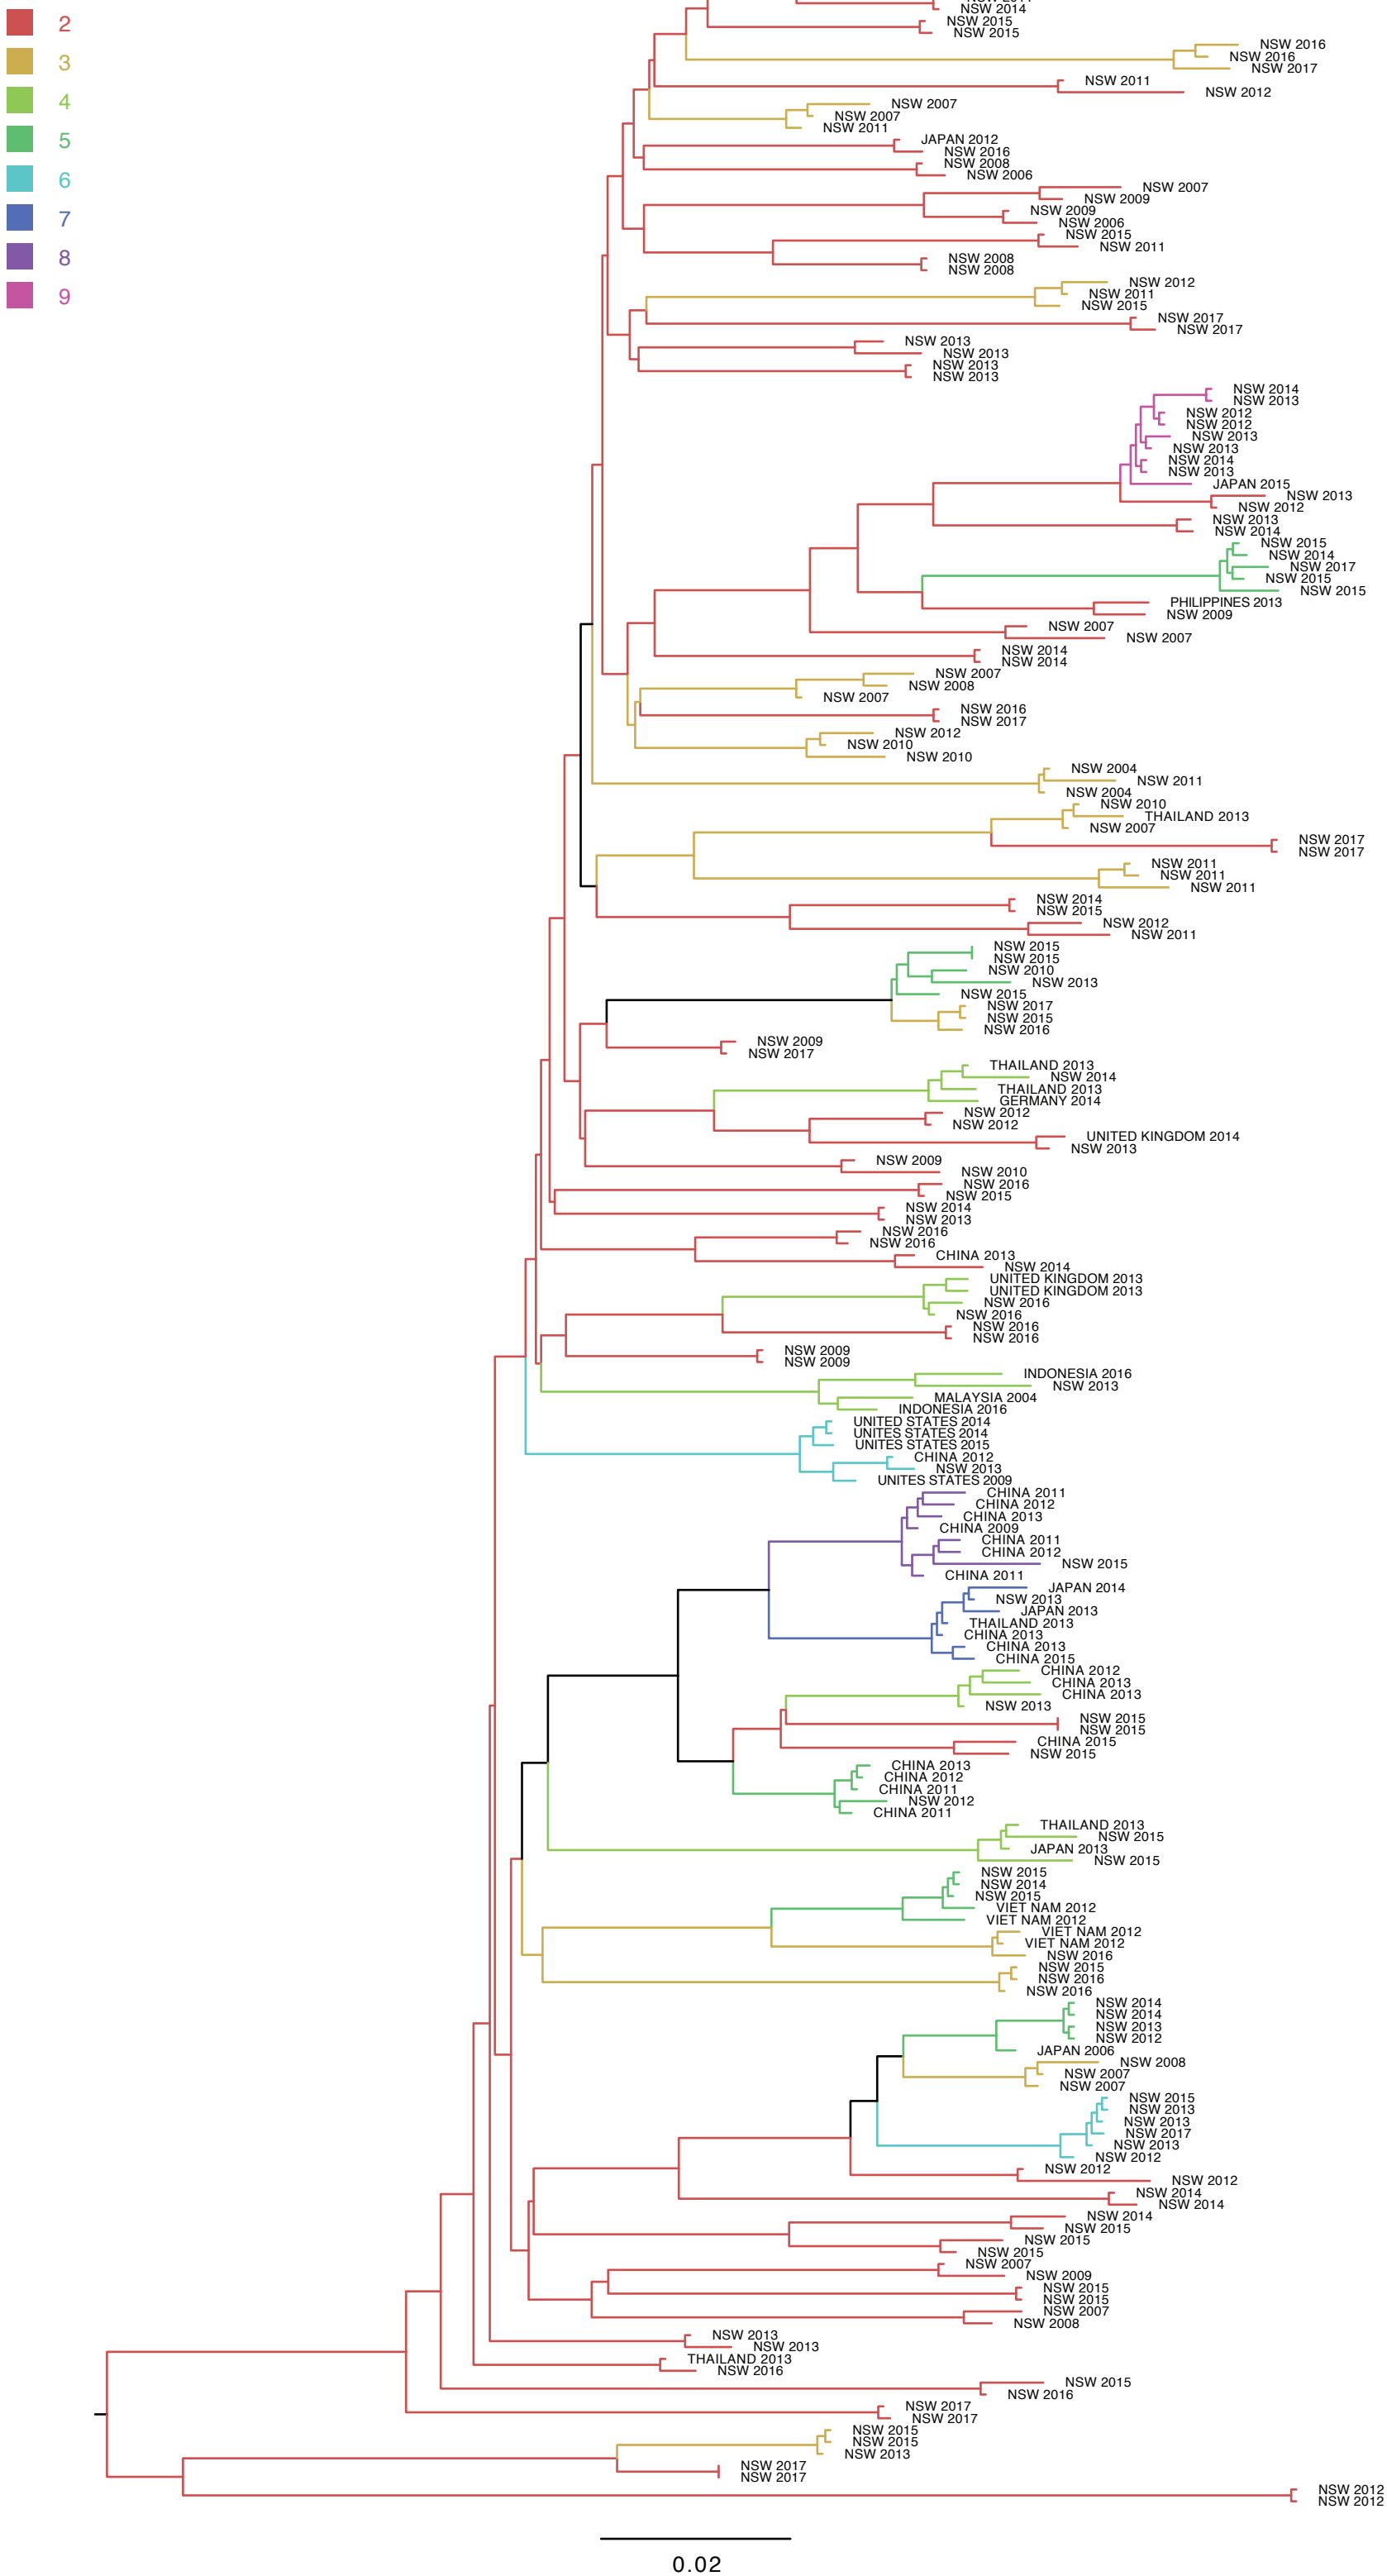

Supplement: s1 [file s1]
